# Supplementary material
Source: PubMed Central journal article supplement (PMC8483759)
Supplement: jci-131-150578-s009.pdf [file jci-131-150578-s009.pdf]

# Supplemental file

## Stromal cell-derived DEL-1 inhibits Tfh cell activation and inflammatory arthritis

Hui Wang<sup>1</sup>, Xiaofei Li<sup>1</sup>, Tetsuhiro Kajikawa<sup>1</sup>, Jieun Shin<sup>1,§</sup>, Jong-Hyung Lim<sup>1</sup>, Ioannis Kourtzelis<sup>2,3</sup>, Kosuke Nagai<sup>2</sup>, Jonathan M. Korostoff<sup>4</sup>, Sylvia Grossklaus<sup>2</sup>, Ronald Naumann<sup>5</sup>, Triantafyllos Chavakis<sup>2,6,‡</sup>, George Hajishengallis<sup>1,‡,\*</sup>

<sup>1</sup> Department of Basic and Translational Sciences, Penn Dental Medicine, University of Pennsylvania, Philadelphia, Pennsylvania 19104, United States

<sup>2</sup> Institute for Clinical Chemistry and Laboratory Medicine, Faculty of Medicine, Technische Universität Dresden, 01307 Dresden, Germany

<sup>3</sup> Hull York Medical School, York Biomedical Research Institute, University of York, York, YO10 5DD, UK

<sup>4</sup> Department of Periodontics, Penn Dental Medicine, University of Pennsylvania, Philadelphia, Pennsylvania 19104, United States

<sup>5</sup> Transgenic Core Facility, Max-Planck-Institute for Molecular Cell Biology and Genetics, Dresden, 01307 Germany

<sup>6</sup> Centre for Cardiovascular Science, Queen's Medical Research Institute, University of Edinburgh, Edinburgh, EH16 4TJ, UK

<sup>§</sup> Current address: Department of Nonclinical Study, CKD Research Institute, CKD Pharmaceutical Corporation, Seoul, South Korea.

<sup>‡</sup> These authors contributed equally as senior authors to the work.

<sup>\*</sup> Corresponding author. E-mail: geoh@upenn.edu

### This file includes:

#### Supplemental Methods

#### References for Supplemental Methods

**Supplemental figure 1:** Flow cytometry gating strategy.

**Supplemental figure 2.** DEL-1 is overexpressed in synovial fibroblasts of ColVI-Del1 mice as compared to WT littermate controls.

**Supplemental figure 3.** ColVI-Del1 mice and WT littermate display similar Th1 and Th17 cell frequencies in inguinal LNs upon CIA.

**Supplemental figure 4.** DEL-1 does not inhibit induction of Tfh differentiation markers by direct action on T cells.

**Supplemental figure 5.** DEL-1 does not affect induction of costimulatory factors in DCs in vitro.

**Supplemental figure 6.** ColVI-Del1 mice display reduced Tfh cell and germinal center (GC) B cell responses in inguinal LNs upon sheep red blood cell (SRBC) immunization.

**Supplemental figure 7.** Hematopoietic cells in transplanted inguinal lymph nodes are predominantly of host (recipient) origin.

42 **Supplemental figure 8.** Transplantation of DEL-1-sufficient (WT) lymph nodes to DEL-1-deficient  
43 hosts (*Del1*<sup>KO</sup>) restrains Tfh and GC-B cell responses.

44 **Supplemental figure 9.** LN stromal cell-derived DEL-1 fails to inhibit Tfh and GC B cells in recipient  
45 *Lfa1*<sup>KO</sup> mice.

46 **Supplemental figure 10.** (A,B) *Del1*<sup>KO</sup> mice and WT littermate controls exhibit comparable  
47 numbers of Tfh cells and GC B cells in steady state. (C) Expression levels of DEL-1 and LFA-1 in the  
48 lymph nodes (LNs) in steady state and upon induction of CIA.

49 **Supplemental figure 11.** (A) *Del1*<sup>KO</sup> and WT littermate control mice exhibit similar frequencies  
50 of Th1 and Th17 cells in inguinal LNs upon CIA. (B) The frequencies of PD-1<sup>+</sup>CXCR5<sup>-</sup> T cells are not  
51 altered by DEL1 overexpression or deletion in the CIA model.

52 **Supplemental figure 12.** DEL-1 inhibits activation of non-Tfh cells in vitro.

53 **Supplemental figure 13.** WT, *Del1*<sup>KO</sup>, EC-Del1, and ColVI-Del1 mice have similar articular cartilage  
54 thickness at steady state.

55

56

## 57 **Supplemental Methods**

### 58 **Reagents**

59 MAbs to the following mouse molecules were purchased from Biolegend: CD45 (clone 30-F11,  
60 catalog 103110, 103106), CD19 (clone 6D5, catalog 115510), B220 (clone RA3-6B2, catalog  
61 103204), CD3 (clone 17A2, catalog 100216), CD4 (clone GK1.5, catalog 100406, 100408, 100412,  
62 100430 or 100410), PD-1 (clone 29F.1A12, catalog 135216 or 135218), ICOS (clone C398.4A,  
63 catalog 313506), CD11b (clone M1/70, catalog 101212), Ly6G (clone 1A8, catalog 127654), F4/80  
64 (clone BM8, catalog 123110), ICOSL (clone HK5.3, catalog 107405), CD80 (clone 16-10A1, catalog  
65 104706), CD86 (clone GL-1, catalog 105026), OX40L (clone RM134L, catalog 108812), IL-17A  
66 (clone TC11-18H10.1, catalog 506908), IFN- $\gamma$  (clone XMG1.2, catalog 505826), Ki-67 (clone 16A8,  
67 catalog 652410 or 652406), TNF- $\alpha$  (clone MP6-XT22, catalog 506328), IL-2 (clone JES6-5H4,  
68 catalog 503824), CD146 (clone ME-9F1, catalog 134704, 134718), CD31 (clone 390, catalog  
69 102410) and isotype controls isotype controls (IgG1, clone RTK2071, catalog 400406, 400416;  
70 IgG2a, clone RTK2758, catalog 400509, 400522, 400536, 400506, 400530, 400508; IgG2b, clone  
71 RTK4530, catalog 400610, 400628, 400606 or 400612). MAbs to CXCR5 (clone 2G8, catalog  
72 551960), BCL6 (clone K112-91, catalog 563363 or 561522), FAS (clone Jo2, catalog 565130),  
73 phospho-ZAP70 (clone 17A/P-ZAP70, catalog 557881) and isotype controls (IgG1, IgG2a and IgG2;  
74 clones X40, R35-95 and Ha4/8 respectively; catalog 562438, 340761, 553928 or 565777) were  
75 obtained from BD Bioscience. Fluorescein-labeled peanut agglutinin (PNA, catalog FL-1071-5) and

76 Vector Blue alkaline phosphatase substrate kit were purchased from Vector Laboratories.  
77 Peroxidase-labeled goat anti-mouse IgG1(catalog 1071-05), IgG2a (catalog 1081-05) or IgG2b  
78 (catalog 1091-05) antibodies were purchased from SouthernBiotech. Alkaline phosphatase-  
79 conjugated streptavidin was obtained from Jackson ImmunoResearch. MAbs to IL-21 (clone  
80 FFA21, catalog 12-7211-82), IgG2b isotype control (clone eBMG2b, catalog 11-4732-81) and  
81 phospho-STAT3 (clone LUVNKLA, catalog 11-9033-42) were from eBioscience. Recombinant anti-  
82 NG2 antibody (clone EPR23976-145, catalog ab275024) was purchased from Abcam. PE-  
83 conjugated goat anti-human IgG-Fc (catalog 12-4998-82) was purchased from Life Technologies.  
84 Full-length human DEL-1 as a fusion protein with the human IgG1-Fc fragment (DEL-1-Fc) and a  
85 point mutant of DEL-1, in which Asp [D] was replaced by Glu [E] in the RGD motif of the second  
86 EGF repeat (DEL-1[RGE]-Fc), were constructed and purified as previously described (1). Fc protein  
87 control was purchased from R&D Systems. As human and mouse DEL-1 share 96% a.a. sequence  
88 and the two proteins have similar functions (1-4), human DEL-1 was used in mouse experimental  
89 systems in the current study, as done earlier (1,4). Recombinant human DEL-1 and recombinant  
90 mouse ICAM-1-Fc chimeric protein were obtained from R&D Systems.

91

### 92 **Isolation of primary synovial fibroblasts from mouse joints**

93 Synovial fibroblasts were isolated using a modification of a previously described protocol (5).  
94 Briefly, mice were euthanized and knee joints were placed in Hank's Balanced Salt Solution (HBSS)  
95 without CaCl<sub>2</sub> and MgCl<sub>2</sub>, supplemented with 1% penicillin/streptomycin. Joints were then placed  
96 in Dulbecco's Modified Eagle Medium (DMEM) with 10 % fetal calf serum, 1% L-glutamine and 1  
97 mg/ml of freshly prepared collagenase type IV, and incubated at 37°C for 1h with shaking. After  
98 vigorous vortexing, samples were centrifuged and cells were placed in culture. Change of medium  
99 was performed every three days and cells were trypsinized upon reaching 90-100% of confluence  
100 for use in downstream analysis.

101

### 102 **Histology**

103 Inguinal LNs and joints were collected and fixed in 4% paraformaldehyde for 20 min or 3 days,  
104 respectively, and joints were decalcified in formic acid for 2 to 3 weeks. The tissues were

105 immersed stepwise in 10%, 20% and 30% sucrose in PBS. The tissues were embedded in Optimal  
106 Cutting Temperature (OCT) media and 6- to 10- $\mu$ m-thick sections were prepared, which were  
107 mounted on SuperFrost Plus slides. Pathology of joints was evaluated by hematoxylin and eosin  
108 (H&E) staining and observation by bright-field microscopy. Cartilage erosion was evaluated by  
109 Safranin-O and Fast Green staining according to the manufacturer's protocol (ScienCell).

110

### 111 **ELISA**

112 Mouse peripheral blood was collected from the orbital venous sinus and sera were analyzed by  
113 ELISA for CII-specific total IgG according to the manufacturer's protocol (Chondrex). CII-specific  
114 IgG1, IgG2a and IgG2b antibodies were measured by ELISA as previously described (6). Briefly, the  
115 plates were coated with 1 $\mu$ g/ml chick CII overnight at 4°C, washed and then blocked with  
116 ELISA/ELISPOT Diluent (PBS supplemented with fetal bovine serum; eBioscience) at room  
117 temperature for 1 h. Samples were then incubated for 2 h at room temperature. The plates were  
118 washed and subsequently incubated with peroxidase-labeled goat anti-mouse IgG1 (catalog  
119 1071-05, 1/2000 dilution, SouthernBiotech), IgG2a (catalog 1081-05, 1/2000 dilution,  
120 SouthernBiotech) or IgG2b (catalog 1091-05, 1/2000 dilution, SouthernBiotech) for 1h at room  
121 temperature. The reaction was developed by adding tetramethylbenzidine (TMB) and stopped  
122 with 2M H<sub>2</sub>SO<sub>4</sub>. OD values were measured at 450 nm. The concentrations of antibodies in test  
123 samples were calculated by interpolation on standard curves generated by using known  
124 concentrations of isotype-specific mouse antibodies to chick Type II Collagen (IgG1, clone 35,  
125 catalog 7048; IgG2a, clone A2-10, catalog 7050; and IgG2b, clone D1-2G, catalog 7052; all from  
126 Chondrex). The concentrations of antibodies were calculated using regression analysis (log/log  
127 plot, Microsoft Excel) followed by multiplication by the dilution factors to obtain the original  
128 sample concentrations. The concentration of DEL-1 in the culture supernatants of synovial  
129 fibroblasts, pericytes and CD4<sup>+</sup> T cells were measured using a sandwich ELISA as previously  
130 described (7,8).

131

### 132 **Flow cytometry**

133 Inguinal LNs were collected and single-cell suspensions were prepared by gently pressing the

134 tissues through a 70- $\mu$ m nylon mesh (Fisherbrand) with the aid of a plastic syringe piston. For  
135 staining intracellular cytokines (IFN $\gamma$ , IL-17, IL-21) in effector T cells, the cells were first stimulated  
136 with PMA (50 ng/ml; Sigma) and ionomycin (500 ng/ml; Sigma) in the presence of GolgiPlug  
137 Protein Transport Inhibitor (BD) for 5 h. No stimulation was performed for staining intracellular  
138 molecules in Tfh cells. Before staining, mononuclear cells were incubated with purified anti-  
139 mouse CD16/32 (clone 93, 1/100 dilution, catalog 101302, Biolegend) for 10 min at 4°C to block  
140 Fc $\gamma$  III/II receptors. For cell surface marker staining, the cells were incubated with antibodies  
141 against various markers (CD3 (clone 17A2, 1/100 dilution, catalog 100216, Biolegend), CD4 (clone  
142 GK1.5, 1/100 dilution, catalog 100406, 100412, 100430 or 100410, Biolegend), CD19 (clone 6D5,  
143 1/100 dilution, catalog 115510, Biolegend), CXCR5 (clone 2G8, 1/50 dilution, catalog 551960, BD  
144 Bioscience), PD-1 (clone 29F.1A12, 1/100 dilution, catalog 135216 or 135218, Biolegend), PNA  
145 (catalog FL-1071-5, Vector Laboratories) and FAS (clone Jo2, 1/100 dilution, catalog 565130, BD  
146 Bioscience)) as indicated in the figures. In case the cells were also stained intracellularly, the cells  
147 were fixed and permeabilized in Cytofix/Cytoperm (BD) followed by staining with antibodies  
148 against IL-17 (clone TC11-18H10.1, 1/100 dilution, catalog 506908, Biolegend), IFN $\gamma$  (clone  
149 XMG1.2, 1/100 dilution, catalog 505826, Biolegend), BCL6 (clone K112-91, 1/20 dilution, catalog  
150 563363 or 561522, BD Bioscience), or Ki-67 (clone 16A8, 1/100 dilution, catalog 652410 or  
151 652406, Biolegend) for 1 h and flow cytometric analysis. For intracellular phospho-Stat3 or  
152 phospho-ZAP70 staining, the cells were fixed with IC Fixation Buffer (eBioscience) and ice-cold  
153 100% methanol, followed by staining with anti-phospho-STAT3 (clone LUVNKLA, 1/20 dilution,  
154 catalog 11-9033-42, eBioscience) and anti-phospho-ZAP70 (clone 17A/P-ZAP70, 1/5 dilution,  
155 catalog 557881, BD Bioscience) for 1 h and flow cytometric analysis.

156       Synovial tissues from joints were digested with 2 mg/mL collagenase type IV (Worthington)  
157 and 0.1 mg/mL DNase I (Roche) in DMEM containing 10% fetal bovine serum and  
158 penicillin/streptomycin for 30 min at 37 °C. Cells were incubated with Live/Dead fixable dye  
159 (Invitrogen) to exclude dead cells, and then were incubated with purified anti-mouse CD16/32  
160 (clone 93, 1/100 dilution, catalog 101302, Biolegend) for 10 min at 4°C to block Fc $\gamma$  III/II receptors.  
161 Cells were then stained with antibodies against CD45 (clone 30-F11, 1/100 dilution, catalog  
162 103110, Biolegend), CD11b (clone M1/70, 1/100 dilution, catalog 101212, Biolegend), Ly6G

163 (clone 1A8, 1/100 dilution, catalog 127654, Biolegend) and F4/80 (clone BM8, 1/100 dilution,  
164 catalog 123110, Biolegend), and subjected to flow cytometry. Cell acquisition was performed on  
165 a NovoCyte flow cytometer (ACEA Biosciences). Data were analyzed with NovoExpress software  
166 (ACEA Biosciences).

167

#### 168 **Cell sorting**

169 LN stromal cells were isolated as previously described (9). Briefly, inguinal lymph nodes were  
170 collected and digested with 1 mg/ml collagenase IV and 40 µg/ml DNase I for 30 min. The non-  
171 stromal cell floating fraction was collected, and the fragments were then digested with 3.5 mg/ml  
172 collagenase IV and 40 µg/ml DNase I for 5 min; the lymph node tissue fragments were  
173 subsequently disaggregated by pipetting. The cells were stained with appropriate stromal cell  
174 markers to identify pericytes (CD45<sup>-</sup>CD31<sup>-</sup>NG2<sup>+</sup>CD146<sup>+</sup>). Cell sorting was performed by using BD  
175 FACS Aria II SORP. CD4<sup>+</sup> T cells (present in the non-stromal floating fraction) were stained with  
176 PE-CD4 (clone GK1.5, 1/100 dilution, catalog 100408, Biolegend) and CD45<sup>-</sup> stromal cells (derived  
177 from further digestion of LN fragments and preparation of cell suspensions) were stained with  
178 PE-CD45 (clone 30-F11, 1/100 dilution, catalog number: 103106, Biolegend) for 15 minutes and  
179 sorted into CD4<sup>+</sup> T cells and CD45<sup>-</sup> stromal cells by using EasySep™ Mouse PE positive selection  
180 kit (Stemcell, 17684).

181

#### 182 **Quantitative real-time PCR**

183 Total RNA was extracted using the GeneJET RNA Purification Kit (Thermo-Fisher Scientific) and  
184 quantified by NanoDrop spectrometry at 260 and 280 nm. The RNA was reverse-transcribed using  
185 the High-Capacity cDNA Archive kit (Applied Biosystems) and real-time PCR with cDNA was  
186 performed using the ABI 7500 Fast System, according to the manufacturer's protocol (Applied  
187 Biosystems). Data were analyzed using the comparative ( $\Delta\Delta C_t$ ) method. TaqMan probes for  
188 detection and quantification of genes investigated in this paper (mouse *Del1* (*Edil3*)  
189 Mm01291247\_m1; mouse *Itgal*, Mm00801807\_m1) were purchased from Thermo-Fisher  
190 Scientific.

191

## 192 **RNA in situ hybridization**

193 RNA in situ hybridization was performed with an RNAscope 2.0 Brown kit or RNAscope  
194 fluorescent multiplex assay kit according to the manufacturer's protocols (Advanced Cell  
195 Diagnostics). Briefly, for RNAscope 2.0 kit, the tissues were pretreated with H<sub>2</sub>O<sub>2</sub> for 10 min,  
196 boiled for 30 min in retrieval buffer, followed by 30 min of protease digestion (RNAscope  
197 Protease Plus). For RNAscope fluorescent multiplex assay kit, the tissues were baked for 30 min  
198 at 60°C, fixed with 4% PFA for 15 min, and boiled for 5 min in retrieval buffer, followed by 30 min  
199 of protease III digestion. The tissues were then incubated with *Edil3* probe (Advanced Cell  
200 Diagnostics) for 2 h at 40°C. *DapB* (a bacterial gene coding for dihydrodipicolinate reductase) and  
201 *PPIB* (a housekeeping gene coding for peptidylprolyl isomerase B) probes (Advanced Cell  
202 Diagnostics) were used as negative and positive controls respectively. The signal was amplified  
203 with sequential hybridization of amplifiers and label probes, then detected by 3,3'-  
204 Diaminobenzidine (DAB), or fluorescent color modules. *Del1* mRNA was visualized by bright-field  
205 microscopy or confocal fluorescence microscopy.

206

## 207 **Immunohistochemistry and immunofluorescence**

208 Sections of LNs were blocked with 5% mouse normal serum in Tris-buffered saline and 0.05%  
209 Tween 20 (TBST) before incubation with biotin-conjugated Ab against B220 (clone RA3-6B2, 1/50  
210 dilution, catalog 103204, Biolegend). Alkaline phosphatase-conjugated streptavidin was used as  
211 secondary reagent and incubated for 1 h at room temperature. Color was developed by using  
212 Vector Blue alkaline phosphatase substrate kit. Images were captured using Nikon Eclipse NiE  
213 automated fluorescent microscope. Sections of inguinal LNs were blocked with 5% mouse normal  
214 serum in Tris-buffered saline and 0.05% Tween 20 (TBST) before incubation with AlexaFluor 647-  
215 conjugated anti-CD146 (clone ME-9F1, 1/50 dilution, catalog 134718, Biolegend) and anti-NG2  
216 (clone EPR23976-145, 1/25 dilution, catalog ab275024, Abcam). AlexaFluor 488-conjugated goat  
217 anti-rabbit IgG was used as secondary antibody and incubated for 1 h at room temperature.  
218 Images were captured using a Nikon C2 & Ti2E confocal microscope.

219

220

221 **In vitro T cell activation and differentiation**

222 Naïve CD4<sup>+</sup> T cells were isolated from the spleen of mice using EasySep Mouse Naïve CD4<sup>+</sup> T Cell  
223 isolation kit (StemCell). Mouse BMDCs were generated by culturing bone marrow cells with 20  
224 ng/ml IL-4 and 20 ng/ml GM-CSF (Biolegend) as previously described (10). On day 6, BMDCs were  
225 stimulated with LPS (100 ng/ml) for 6 h, followed by washing three times. The LPS-activated  
226 BMDCs were then co-cultured with naïve CD4<sup>+</sup> T cells stimulated with anti-CD3 (clone 145-2C11,  
227 5 µg/ml, catalog 100302, Biolegend) and anti-CD28 (clone 37.51, 5 µg/ml, catalog 102102,  
228 Biolegend) at a ratio of 1:10, in the presence or not of 10 µg/ml DEL-1-Fc or DEL-1[RGE]-Fc, or  
229 equal molar concentration of Fc control for 3 days (to investigate activation markers and  
230 proliferation) or 7 days (to investigate Tfh differentiation). To determine Tfh differentiation, the  
231 cells were fixed and permeabilized in Cytofix/Cytoperm (BD) followed by staining with antibodies  
232 against CD4 (clone GK1.5, 1/100 dilution, catalog 100406, 100412, 100430 or 100410, Biolegend),  
233 CXCR5 (clone 2G8, 1/50 dilution, catalog 551960, BD Bioscience), PD-1 (clone 29F.1A12, 1/100  
234 dilution, catalog 135216 or 135218, Biolegend), ICOS (clone C398.4A, 1/100 dilution, catalog  
235 313506, Biolegend) and BCL6 (clone K112-91, 1/20 dilution, catalog 563363 or 561522, BD  
236 Bioscience) and flow cytometric analysis. To determine the effect of DEL-1 on T cell activation  
237 markers, the cells were fixed and permeabilized with IC Fixation Buffer (eBioscience) and ice-cold  
238 100% methanol (11), followed by staining with antibodies to pSTAT3 (clone LUVNKLA, 1/20  
239 dilution, catalog 11-9033-42, eBioscience) or pZAP70 (clone 17A/P-ZAP70, 1/5 dilution, catalog  
240 557881, BD Bioscience) and flow cytometric analysis. To determine the effect of DEL-1 on T cell  
241 proliferation or activation, the cells were fixed and permeabilized in Cytofix/Cytoperm (BD) and  
242 stained with antibody to Ki67 (clone 16A8, 1/100 dilution, catalog 652406, Biolegend), TNF-α  
243 (clone MP6-XT22, 1/100 dilution, catalog 506328, Biolegend) or IL-2 (clone JES6-5H4, 1/100  
244 dilution, catalog 503824, Biolegend).

245 Some experiments determined the ability of DEL-1 to influence Tfh differentiation by direct  
246 action on T cells. In this case, naive splenic CD4<sup>+</sup> cells (isolated as above) were cultured for 24h  
247 on plates coated with anti-CD3/anti-CD28 (as above) under Tfh differentiation conditions: anti-IL-  
248 4 (clone 11B11, 10 µg/ml, catalog 504121, Biolegend), anti-IFNγ (clone R4-6A2, 10 µg/ml, catalog  
249 505708, Biolegend), anti-TGF-β (clone TW7-20B9 20 µg/ml, catalog 141302, Biolegend) and IL-6



250 (100 ng/ml) or under non-differentiation conditions (anti-IL-4, anti-IFN $\gamma$ , and anti-TGF- $\beta$  without  
251 IL-6), in the presence of 10  $\mu$ g/ml DEL-1-Fc or equal molar concentration of Fc control.

252

### 253 **Binding assay**

254 An ICAM-1 binding assay was performed essentially as previously described (12). Briefly, inguinal  
255 LNs were harvested on day 10 from mice subjected to CIA (i.d. injection of 2 mg/ml CII emulsified  
256 with 2 mg/ml CFA into the tail of WT mice) and single-cell suspensions were prepared by gently  
257 pressing the tissues through a 70- $\mu$ m nylon mesh (FisherBrand) with the aid of a plastic syringe  
258 piston. Cells were resuspended in RPMI medium containing 0.1% BSA, 1mM EGTA and 5mM Mg $^{2+}$   
259 at a concentration of  $5 \times 10^6$  cells/ml and incubated for 30 mins at 37° C in the presence of 2  $\mu$ g/ml  
260 ICAM-1-Fc chimeric protein (R&D Systems) and increasing concentrations of DEL-1 (R&D Systems)  
261 as a potential inhibitor. The cells were washed twice and stained with Tfh markers and PE-  
262 conjugated goat anti-human IgG-Fc followed by flow cytometry. Tfh cells were identified as  
263 CD4 $^+$ CD19 $^-$ CXCR5 $^+$ PD-1 $^{\text{high}}$ .

264

### 265 **SRBC immunization**

266 10% packed sheep red blood cells (MP Biomedicals) were washed and resuspended in PBS. Then  
267  $2 \times 10^8$  SRBCs were injected i.v. into the orbital sinus of mice. On day 7, mononuclear cells from  
268 inguinal LNs were collected, and stained for markers of GC B cells (CD19, PNA, Fas) and Tfh cells  
269 (CD4, PD-1, CXCR5 and BCL6), followed by flow cytometry. On days 0, 7 and 14, mouse peripheral  
270 blood was collected from the orbital venous sinus and serum was analyzed by ELISA for anti-SRBC  
271 IgG antibodies (Abnova) as well as for the levels of total IgG1, IgG2a and IgG2b (Invitrogen),  
272 according to the protocols of the manufacturers.

273

274

275

276

277

278

279 **References for Supplemental Methods**

- 280 1. Shin J, Maekawa T, Abe T, Hajishengallis E, Hosur K, Pyaram K, et al. DEL-1 restrains  
281 osteoclastogenesis and inhibits inflammatory bone loss in nonhuman primates. *Sci*  
282 *Transl Med.* 2015;7(307):307ra155.
- 283 2. Choi EY, Chavakis E, Czabanka MA, Langer HF, Fraemohs L, Economopoulou M, et al.  
284 Del-1, an endogenous leukocyte-endothelial adhesion inhibitor, limits inflammatory cell  
285 recruitment. *Science.* 2008;322(5904):1101-4.
- 286 3. Eskin MA, Jotwani R, Abe T, Chmelar J, Lim JH, Liang S, et al. The leukocyte integrin  
287 antagonist Del-1 inhibits IL-17-mediated inflammatory bone loss. *Nat Immunol.*  
288 2012;13(5):465-73.
- 289 4. Kourtzelis I, Li X, Mitroulis I, Grosser D, Kajikawa T, Wang B, et al. DEL-1 promotes  
290 macrophage efferocytosis and clearance of inflammation. *Nat Immunol.* 2019;20(1):40-  
291 9.
- 292 5. Armaka M, Gkretsi V, Kontoyiannis D, and Kollias G. A standardized protocol for the  
293 isolation and culture of normal and arthritogenic murine synovial fibroblasts. *Protoc*  
294 *Exchange.* 2009;<https://doi.org/10.1038/nprot.2009.102>. .
- 295 6. Wang H, Mo L, Xiao X, An S, Liu X, Ba J, et al. Proliferation of Dermatophagoides farinae  
296 promotes ovalbumin-induced airway allergy by modulating the functions of dendritic  
297 cells in a mouse model. *Sci Rep.* 2017;7:43322.
- 298 7. Maekawa T, Hosur K, Abe T, Kantarci A, Ziogas A, Wang B, et al. Antagonistic effects of  
299 IL-17 and D-resolvins on endothelial Del-1 expression through a GSK-3beta-C/EBPbeta  
300 pathway. *Nat Commun.* 2015;6:8272.
- 301 8. Dasgupta SK, Le A, Chavakis T, Rumbaut RE, and Thiagarajan P. Developmental  
302 endothelial locus-1 (Del-1) mediates clearance of platelet microparticles by the  
303 endothelium. *Circulation.* 2012;125(13):1664-72.
- 304 9. Broggi MA, Schmalzer M, Lagarde N, and Rossi SW. Isolation of murine lymph node  
305 stromal cells. *J Vis Exp.* 2014(90):e51803.
- 306 10. Matheu MP, Sen D, Cahalan MD, and Parker I. Generation of bone marrow derived  
307 murine dendritic cells for use in 2-photon imaging. *J Vis Exp.* 2008(17).
- 308 11. Ferraro RD, Wallweber HJ, and Lupardus PJ. Receptor-mediated dimerization of JAK2  
309 FERM domains is required for JAK2 activation. *Elife.* 2018;7:e38089.
- 310 12. Meli AP, Fontes G, Avery DT, Leddon SA, Tam M, Elliot M, et al. The Integrin LFA-1  
311 Controls T Follicular Helper Cell Generation and Maintenance. *Immunity.*  
312 2016;45(4):831-46.
- 313 13. Wang Z, Tran MC, Bhatia NJ, Hsing AW, Chen C, LaRussa MF, et al. Del1 Knockout Mice  
314 Developed More Severe Osteoarthritis Associated with Increased Susceptibility of  
315 Chondrocytes to Apoptosis. *PLoS One.* 2016;11(8):e0160684.

316  
317  
318  
319  
320  
321

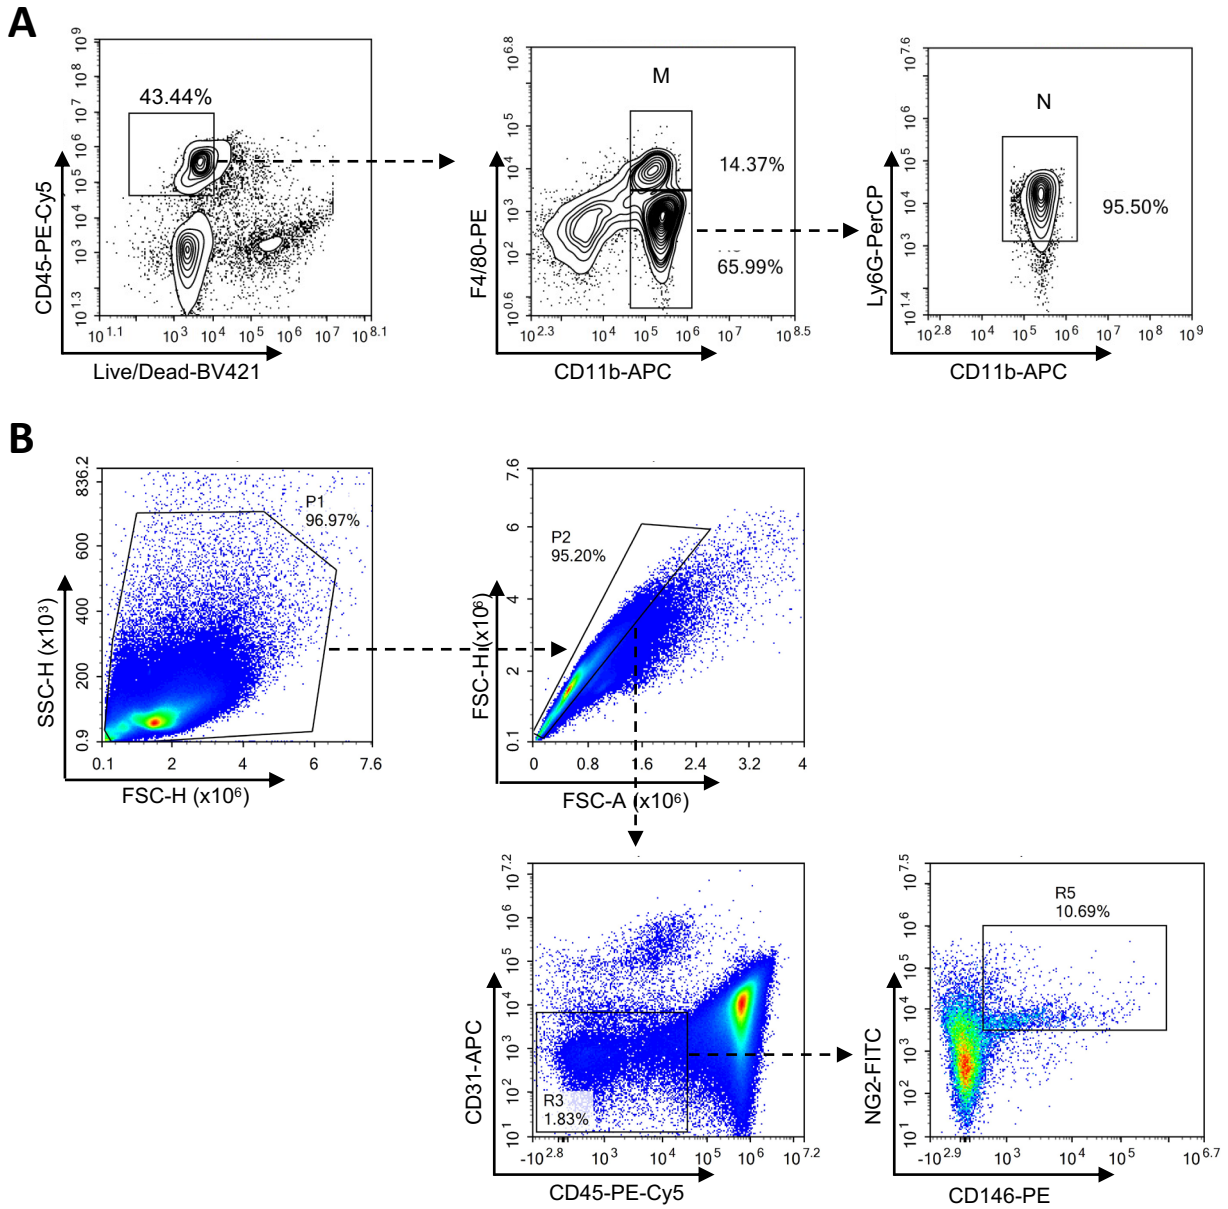

322  
 323  
 324  
 325  
 326  
 327  
 328  
 329  
 330  
 331  
 332  
 333

**Supplemental figure 1: Flow cytometry gating strategies.** (A) Gating strategy to identify macrophages (live CD45<sup>+</sup>CD11b<sup>+</sup>F4/80<sup>+</sup>) and neutrophils (live CD45<sup>+</sup>CD11b<sup>+</sup>F4/80<sup>-</sup>Ly6G<sup>+</sup>) in the synovium of knee joints. M, macrophages; N, neutrophils. (B) Gating strategy of cell sorting of pericytes (CD45<sup>-</sup>CD31<sup>-</sup>NG2<sup>+</sup>CD146<sup>+</sup>).

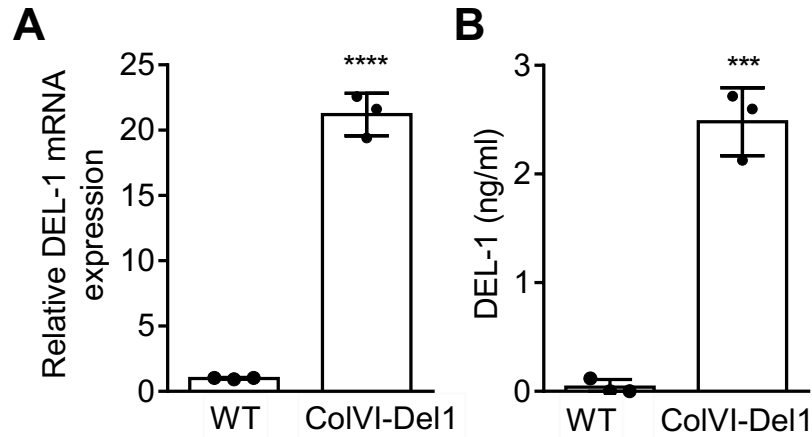

334  
335

336 **Supplemental figure 2. DEL-1 is overexpressed in synovial fibroblasts of CoIVI-Del1 mice as**  
 337 **compared to WT littermate controls.** Synovial fibroblasts were isolated from the joints of WT or  
 338 CoIVI-Del1 mice and were cultured for 24h to determine, respectively, (A) *Del1* mRNA expression  
 339 by qPCR or (B) DEL-1 protein release in culture supernatants using ELISA. Data are means ± SD  
 340 ( $n= 3$  cultures/group). \*\*\* $P < 0.001$ ; \*\*\*\* $P < 0.0001$ . Student's unpaired *t*-test.

341  
342  
343  
344  
345  
346  
347  
348  
349  
350  
351  
352  
353

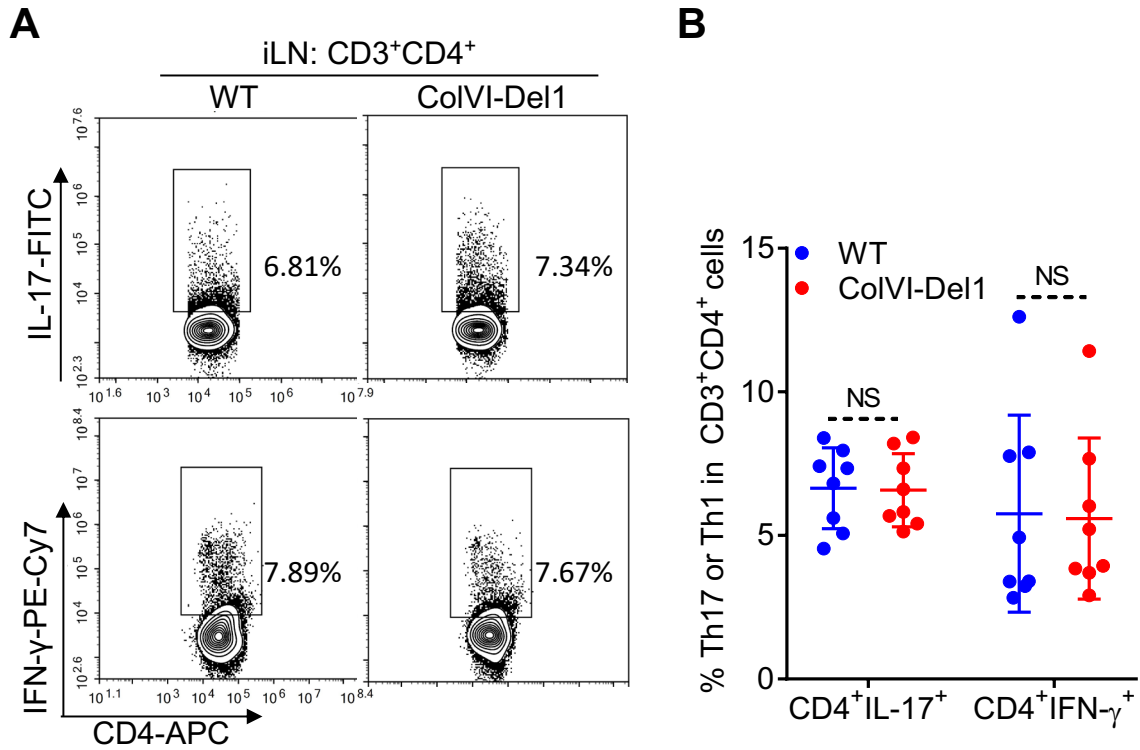

354  
355  
356  
357  
358  
359  
360  
361  
362  
363  
364  
365  
366  
367  
368  
369

**Supplemental figure 3. ColVI-Del1 mice and WT littermate display similar Th1 and Th17 cell frequencies in inguinal LNs upon CIA.** CIA was induced by i.d. injection of 2 mg/ml CII emulsified with 2 mg/ml CFA into the tail at day 0 in groups of ColVI-Del1 mice and WT littermate controls. On day 10, mononuclear cells from inguinal LNs were harvested and processed for staining for CD3, CD4 as well as IFN- $\gamma$  and IL-17, markers for Th1 and Th17 cells, respectively. **(A)** Representative FACS plots and **(B)** frequencies of indicated Th cell subsets. Data are means  $\pm$  SD ( $n = 8$  mice/group) from two independent experiments. NS, not significant. Student's unpaired  $t$ -test.

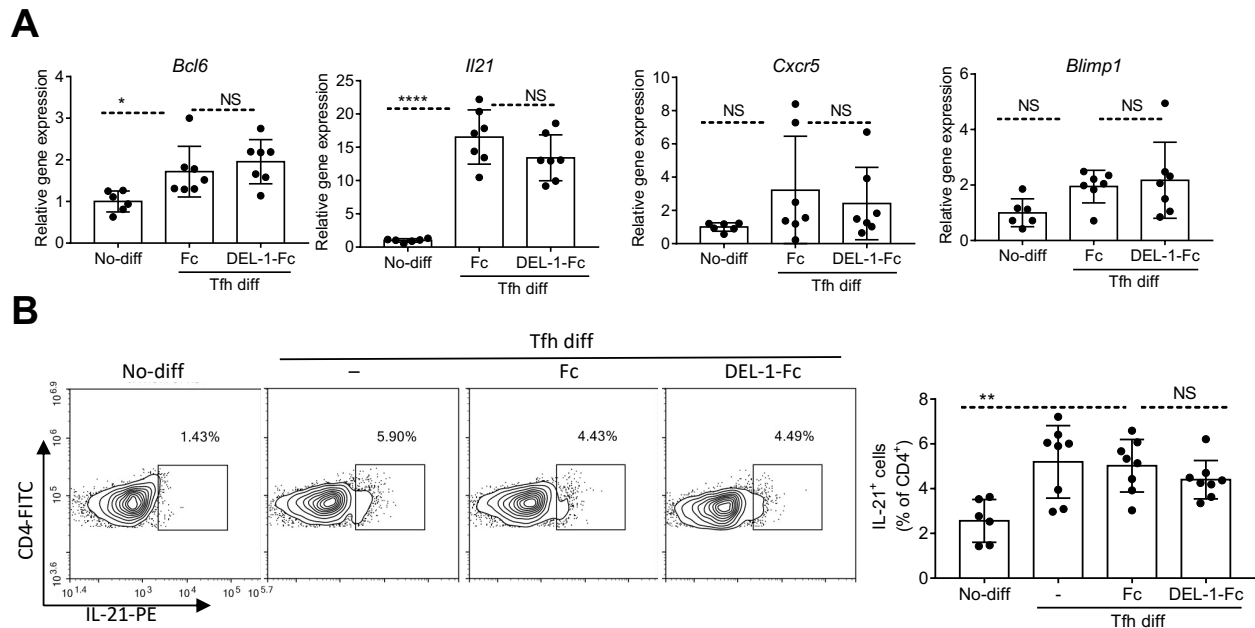

370  
 371  
 372  
 373  
 374  
 375  
 376  
 377  
 378  
 379  
 380  
 381  
 382  
 383  
 384  
 385  
 386  
 387

**Supplemental figure 4. DEL-1 does not inhibit induction of Tfh differentiation markers by direct action on T cells.** Naive splenic CD4<sup>+</sup> cells were cultured for 24h on plates coated with anti-CD3/anti-CD28 under Tfh differentiation conditions (anti-IL-4, anti-IFN- $\gamma$ , anti-TGF- $\beta$  and IL-6; 'Tfh diff') or under non-differentiation conditions (anti-IL-4, anti-IFN- $\gamma$ , and anti-TGF- $\beta$  without IL-6; 'No-diff'), in the presence of 10  $\mu$ g/ml DEL-1-Fc or equal molar concentration of Fc control. (A) Cells were harvested and total RNA was extracted and processed for quantitative real-time PCR to determine expression of the indicated molecules. Data were normalized to *Gapdh* mRNA and presented as fold change in the transcript levels relative to those of controls (set as 1). (B) Naive splenic CD4<sup>+</sup> cells were cultured for 72h on plates coated with anti-CD3/anti-CD28 under the above-specified differentiation conditions ('No-diff' vs 'Tfh diff') and analyzed for IL-21 protein expression by flow cytometry. Shown are representative FACS plots (left) and data analysis of the percentage of IL-21<sup>+</sup> cells in CD4<sup>+</sup> T cells from the in vitro culture system. Data are means  $\pm$  SD ( $n$ = 6-8 cultures/group, from two independent experiments). NS, not significant. One-way ANOVA and Dunnett's multiple-comparisons test except for A, *Cxcr5* panel (Kruskal-Wallis test and Dunn's multiple comparisons test).

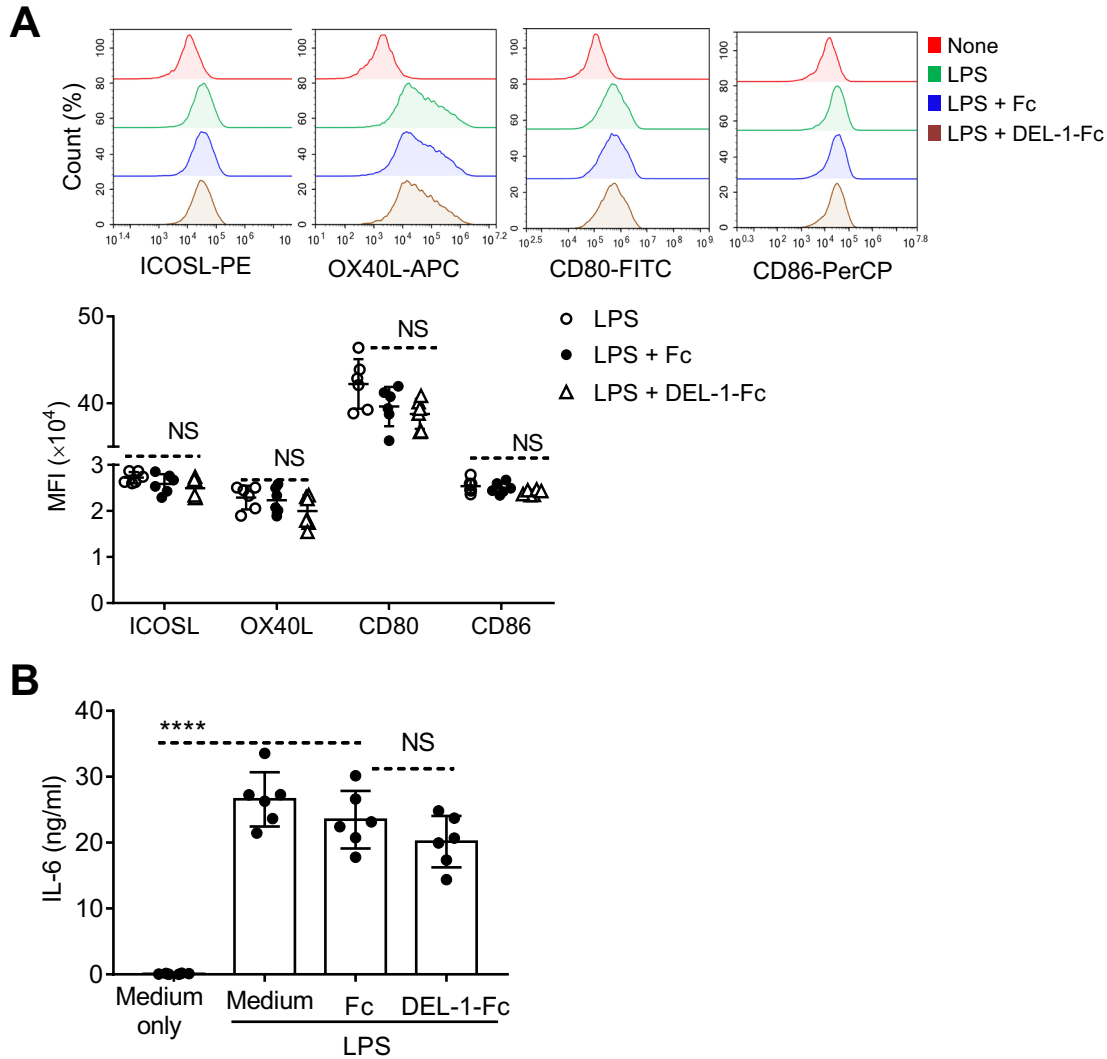

388  
 389 **Supplemental figure 5. DEL-1 does not affect induction of costimulatory factors in DCs in vitro.**  
 390 BMDC were treated with LPS (100 ng/ml) in the presence or not of 10  $\mu$ g/ml Del-1-Fc or equal  
 391 molar concentration of Fc control for 48h. (A) The cells were stained for the indicated cell surface  
 392 molecules and analyzed by flow cytometry. Shown are representative FACS histograms (top) and  
 393 bar graphs showing individual MFI values (bottom). (B) The culture supernatants were collected  
 394 to measure IL-6 by ELISA. Data are means  $\pm$  SD ( $n=6$  cultures/group, from two independent  
 395 experiments). NS, not significant. One-way ANOVA and Dunnett's multiple-comparisons test.  
 396 ICOSL, ICOS ligand.

397  
 398  
 399  
 400

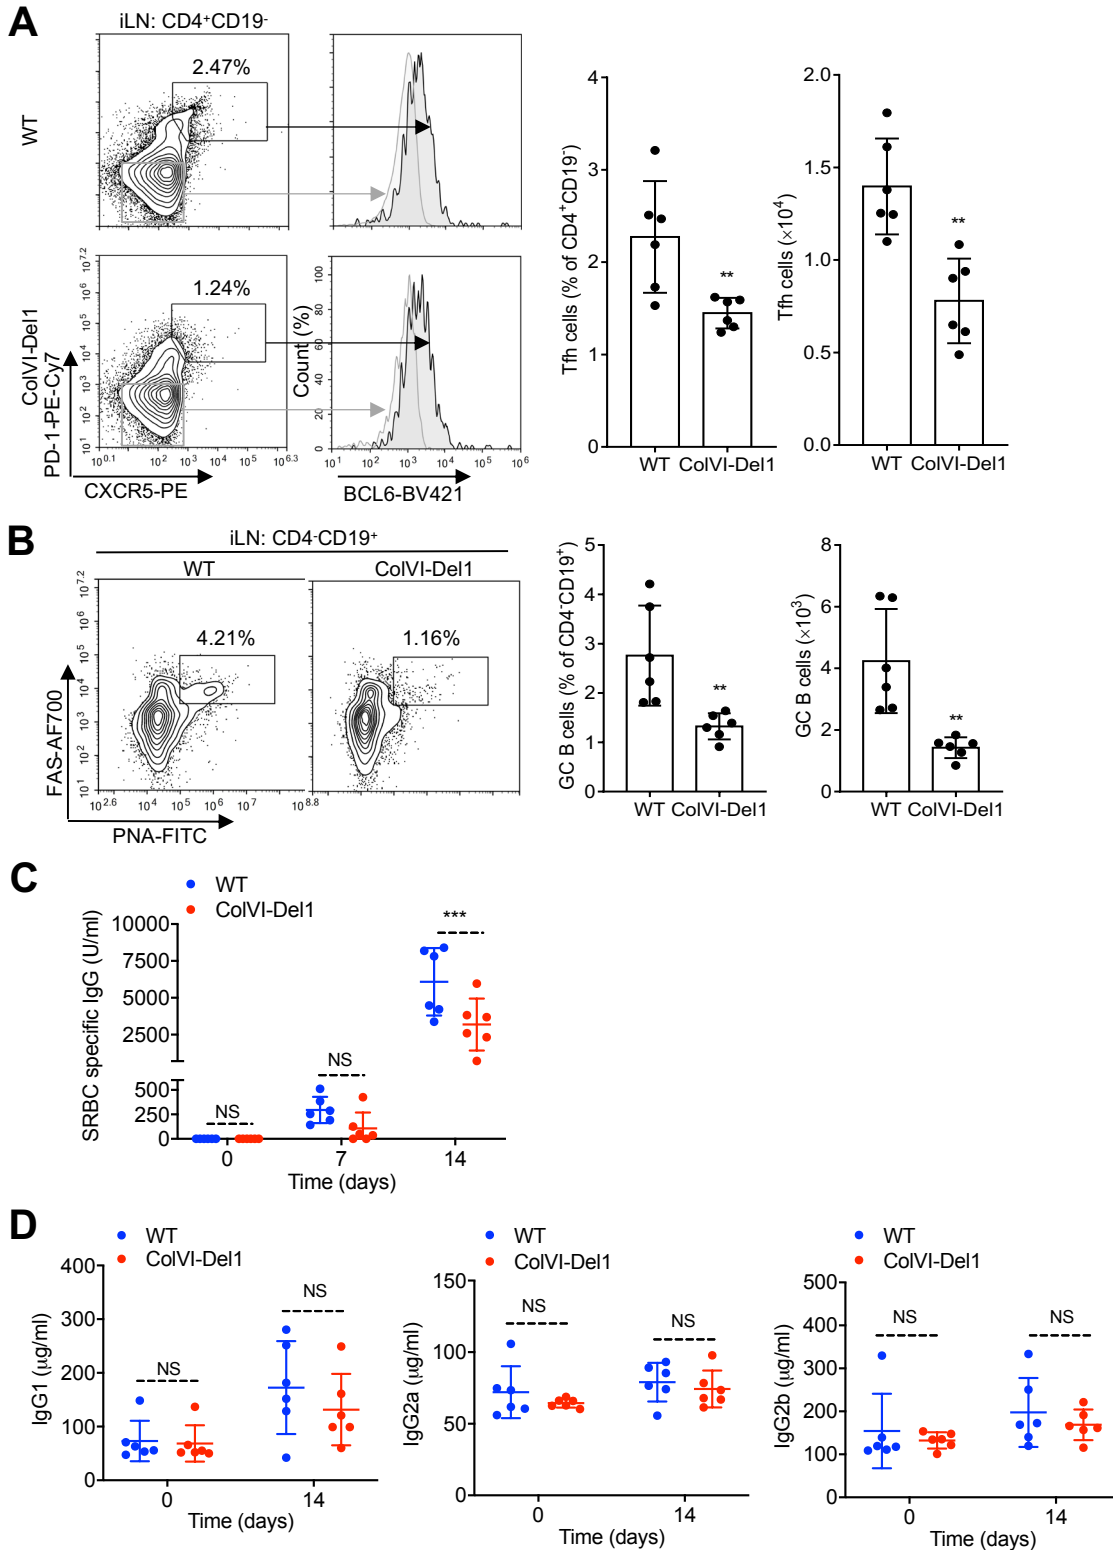

401  
 402 **Supplemental figure 6. ColVI-Del1 mice display reduced Tfh cell and germinal center (GC) B cell**  
 403 **responses in inguinal LNs upon sheep red blood cell (SRBC) immunization.** ColVI-Del1 mice and  
 404 WT littermate controls were immunized with  $2 \times 10^8$  SRBCs i.v. On day 7, mononuclear cells from  
 405 inguinal LNs were harvested and stained for the indicated Tfh and GC B cell markers followed by



406 flow cytometry. **(A)** Representative FACS plots (left) and frequencies and numbers of Tfh cells  
407 defined as CD4<sup>+</sup>CD19<sup>-</sup> CXCR5<sup>+</sup>PD-1<sup>high</sup>BCL6<sup>high</sup> cells. **(B)** Representative FACS plots (left) and  
408 frequencies and numbers of GC B cells defined as CD4<sup>-</sup>CD19<sup>+</sup>PNA<sup>+</sup>FAS<sup>+</sup> cells (right). **(C)** IgG anti-  
409 SRBC Ab responses in the serum collected at the indicated timepoints. **(D)** Serum concentrations  
410 of indicated IgG isotypes in ColVI-Del1 and WT littermates sampled at day 0 (steady state) and 14  
411 days after immunization. Data are means  $\pm$  SD ( $n= 6$  mice/group). \*\* $P < 0.01$ ; \*\*\* $P < 0.001$ ; NS,  
412 not significant. Student's unpaired  $t$ -test **(A,B)**; two-way ANOVA with repeated measures and  
413 Sidak's multiple comparisons test **(C,D)**. U, units.

414  
415  
416  
417  
418  
419  
420  
421  
422  
423  
424  
425  
426  
427  
428  
429  
430  
431  
432  
433  
434  
435  
436  
437

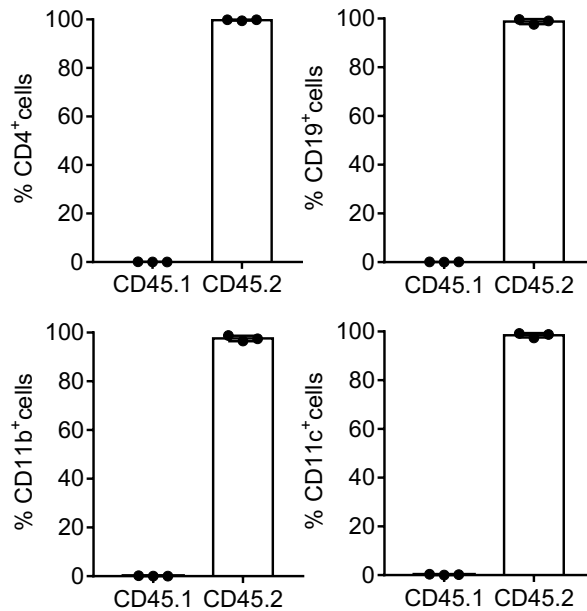

438  
439

440 **Supplemental figure 7. Hematopoietic cells in transplanted inguinal lymph nodes are**  
 441 **predominantly of host (recipient) origin.** Inguinal LNs from donor C57BL/6.SJL CD45.1<sup>+</sup> mice  
 442 (which differ from the C57BL/6 CD45.2<sup>+</sup> strain only in expression of CD45.1 vs. CD45.2, thus  
 443 allowing the distinction of donor and recipient cells) were unilaterally transplanted into CD45.2<sup>+</sup>  
 444 recipient mice. After 4 weeks, LNs were collected and analyzed for CD4<sup>+</sup>, CD19<sup>+</sup>, CD11b<sup>+</sup> and  
 445 CD11c<sup>+</sup> cells by using flow cytometry. Data are means  $\pm$  SD ( $n=3$  mice/group).

446  
447  
448  
449  
450  
451  
452  
453  
454

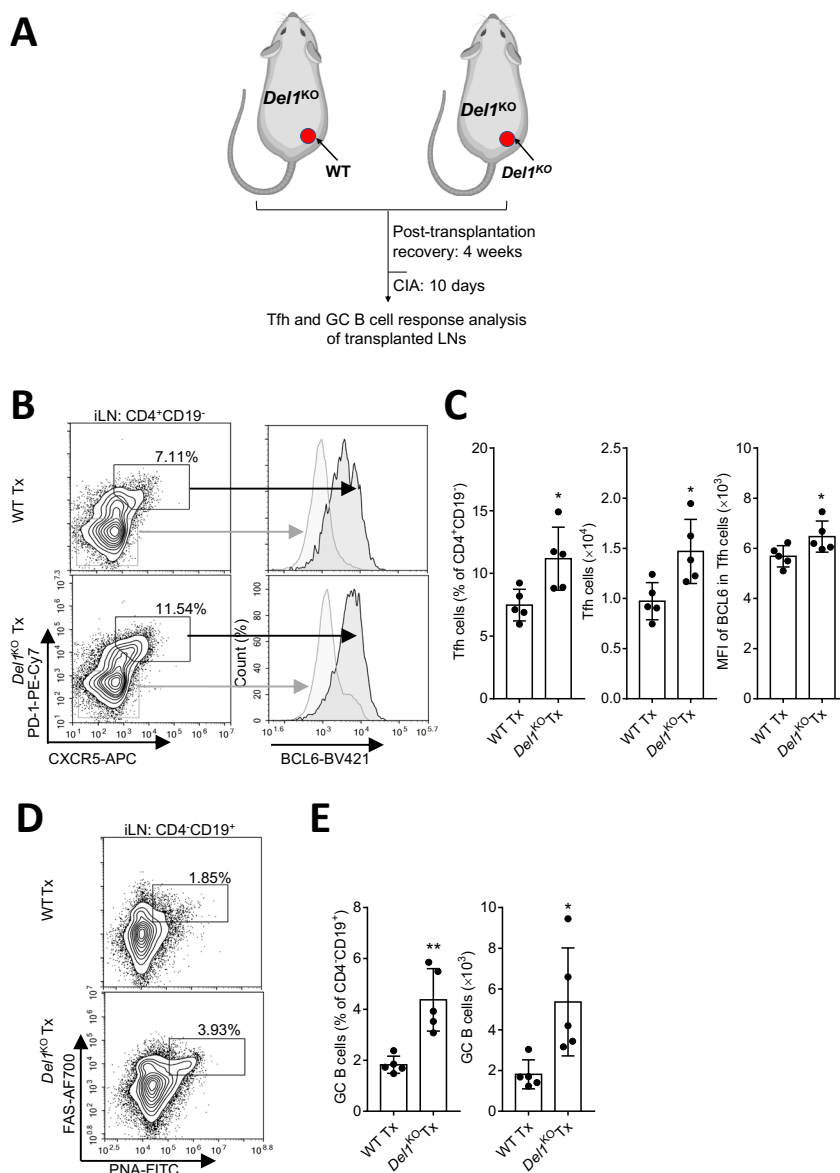

455  
 456 **Supplemental figure 8. Transplantation of DEL-1-sufficient (WT) lymph nodes to DEL-1-deficient**  
 457 **hosts (*Del1*<sup>KO</sup>) restrains Tfh and GC-B cell responses. (A)** LN transplantation-based experimental  
 458 design to study the function of LN stromal cell-derived DEL-1 in recipient *Del1*<sup>KO</sup> mice. **(B-E)**  
 459 Inguinal LNs of *Del1*<sup>KO</sup> recipient mice were surgically replaced unilaterally by inguinal LNs from  
 460 WT or *Del1*<sup>KO</sup> mice. After 4 weeks, CIA was induced in the recipient mice by i.d. injection into the  
 461 tail of 2 mg/ml CII emulsified with 1 mg/ml CFA. On day 10, mononuclear cells from the  
 462 transplanted inguinal LNs were harvested and analyzed for the indicated Tfh and GC B cell  
 463 markers by flow cytometry. **(B)** Representative FACS plots and **(C)** frequencies and numbers of  
 464 Tfh cells defined as CD4<sup>+</sup>CD19<sup>-</sup> CXCR5<sup>+</sup>PD-1<sup>hi</sup>BCL6<sup>hi</sup> cells (left and middle, respectively) and MFI  
 465 of BCL6 expression (right) in CD4<sup>+</sup>CD19<sup>-</sup>CXCR5<sup>+</sup>PD-1<sup>hi</sup> cells. **(D)** Representative FACS plots and **(E)**  
 466 frequencies and numbers of GC B cells defined as CD4<sup>-</sup>CD19<sup>+</sup>PNA<sup>+</sup>FAS<sup>+</sup> cells. Data are means  $\pm$  SD  
 467 ( $n = 5$  mice/group). \* $P < 0.05$ ; \*\* $P < 0.01$ ; \*\*\* $P < 0.001$ ; NS, not significant. Student's unpaired *t*-  
 468 test.

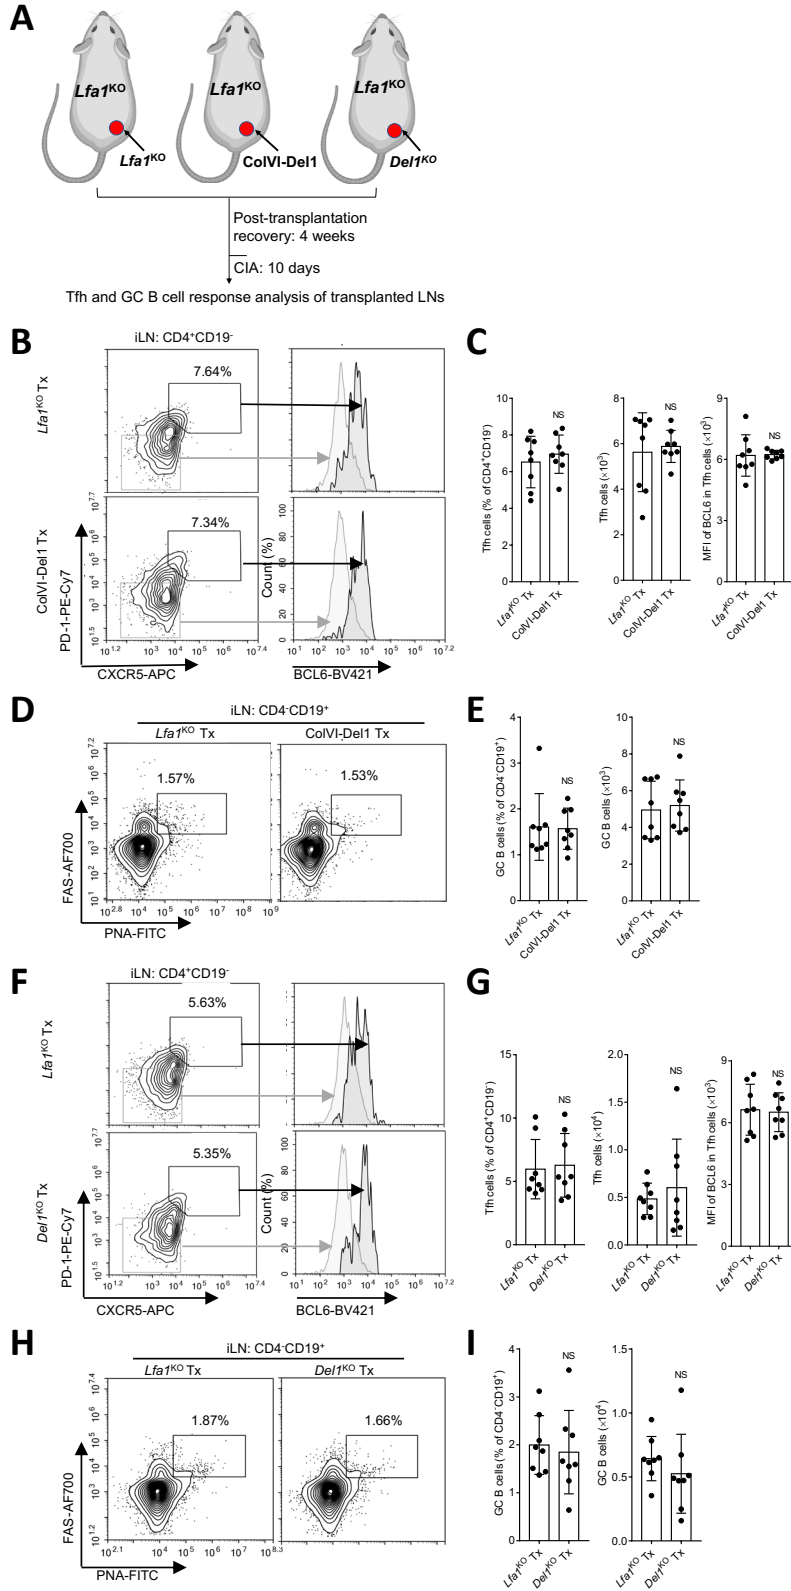

469  
470  
471

**Supplemental figure 9. LN stromal cell-derived DEL-1 fails to inhibit Tfh and GC B cells in recipient *Lfa1*<sup>KO</sup> mice. (A) LN transplantation-based experimental design to study the function of**

472 LN stromal cell-derived DEL-1 in recipient *Lfa1*<sup>KO</sup> mice. Inguinal LNs of *Lfa1*<sup>KO</sup> recipient mice were  
473 surgically replaced unilaterally by inguinal LNs from ColVI-Del1 (**B-E**) or *Del1*<sup>KO</sup> (**F-I**) mice or from  
474 *Lfa1*<sup>KO</sup> donors (**B-I**), which served as control (for the surgical treatment and for expression of WT  
475 levels of DEL-1). (**B-I**) After 4 weeks, CIA was induced in the recipient mice by i.d. injection into  
476 the tail of 2 mg/ml CII emulsified with 2 mg/ml (**B-E**) or 1 mg/ml (**F-I**) CFA. On day 10, mononuclear  
477 cells from the transplanted inguinal LNs were harvested and analyzed for the indicated Tfh and  
478 GC B cell markers by flow cytometry. (**B,F**) Representative FACS plots and (**C,G**) frequencies and  
479 numbers of Tfh cells defined as CD4<sup>+</sup>CD19<sup>-</sup>CXCR5<sup>+</sup>PD-1<sup>hi</sup>BCL6<sup>hi</sup> cells (left and middle) and MFI of  
480 BCL6 expression in CD4<sup>+</sup>CD19<sup>-</sup>CXCR5<sup>+</sup>PD-1<sup>hi</sup> cells (right). (**D,H**) Representative FACS plots and (**E,I**)  
481 frequencies and numbers of GC B cells defined as CD4<sup>-</sup>CD19<sup>+</sup>PNA<sup>+</sup>FAS<sup>+</sup> cells. Data are means ± SD  
482 (*n* = 8 mice/group, from two independent experiments). NS, not significant. Student's unpaired  
483 *t*-test (**C**, **E** right, **G** middle & right, **I**); Mann-Whitney test (**E** left, **G** left).

484  
485  
486  
487  
488  
489  
490  
491  
492  
493  
494  
495  
496  
497  
498  
499  
500  
501  
502  
503  
504  
505  
506  
507  
508  
509  
510  
511  
512  
513  
514

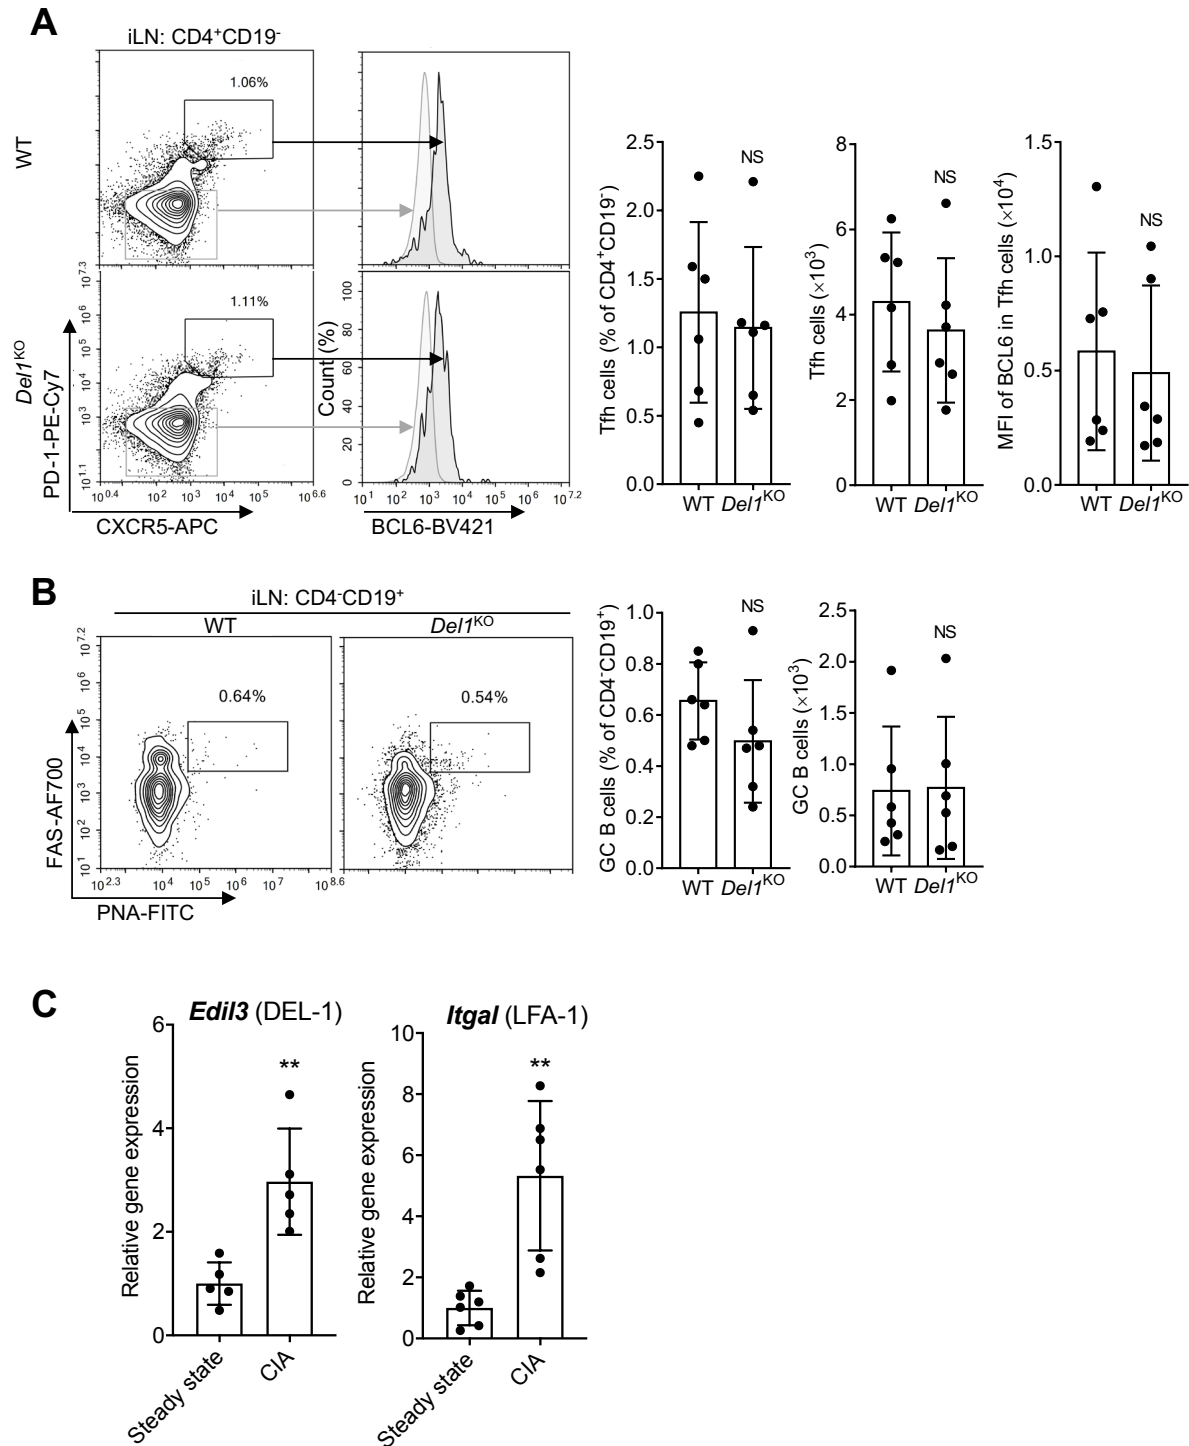

515  
 516  
 517  
 518  
 519  
 520  
 521

**Supplemental figure 10. (A-B)  $Del1^{KO}$  mice and WT littermate controls exhibit comparable numbers of Tfh cells and GC B cells in steady state.** Mononuclear cells of inguinal LNs from 7- to 8- week-old WT and  $Del1^{KO}$  mice were harvested and analyzed by flow cytometry for the indicated Tfh and GC B cell markers. **(A)** Representative FACS plots (left) and frequencies and numbers of Tfh cells defined as CD4<sup>+</sup>CD19<sup>-</sup>CXCR5<sup>+</sup>PD-1<sup>high</sup>BCL6<sup>high</sup> cells (middle) and MFI of BCL6

522 expression in CD4<sup>+</sup>CD19<sup>-</sup>CXCR5<sup>+</sup>PD-1<sup>high</sup> cells (right). **(B)** Representative FACS plots (left) and  
523 frequencies and numbers of GC B cells (right). Data are means  $\pm$  SD ( $n = 6$  mice/group). NS, not  
524 significant. Student's unpaired  $t$ -test. **(C) Expression levels of DEL-1 and LFA-1 in the lymph**  
525 **nodes (LNs) in steady state and upon induction of CIA.** Inguinal LNs from 7- to 8- week-old WT  
526 mice, in steady state or upon induction of CIA for 10 days, were digested with collagenase IV and  
527 cell suspensions were prepared. Total RNA was extracted from sorted CD45<sup>-</sup> stromal cells and  
528 CD4<sup>+</sup> T cells and quantitative real-time PCR was performed to determine the expression of *Edil3*  
529 (the gene encoding DEL-1) and of *Itgal* (the gene encoding the CD11a subunit of LFA-1). Results  
530 were normalized to *Gapdh* mRNA and presented as fold change in the transcript levels relative  
531 to those at steady state (set as 1). Data means  $\pm$  SD ( $n = 5-6$  mice/group, from two independent  
532 experiments). \*\* $P < 0.01$ . Student's unpaired  $t$ -test.

533  
534  
535  
536  
537  
538

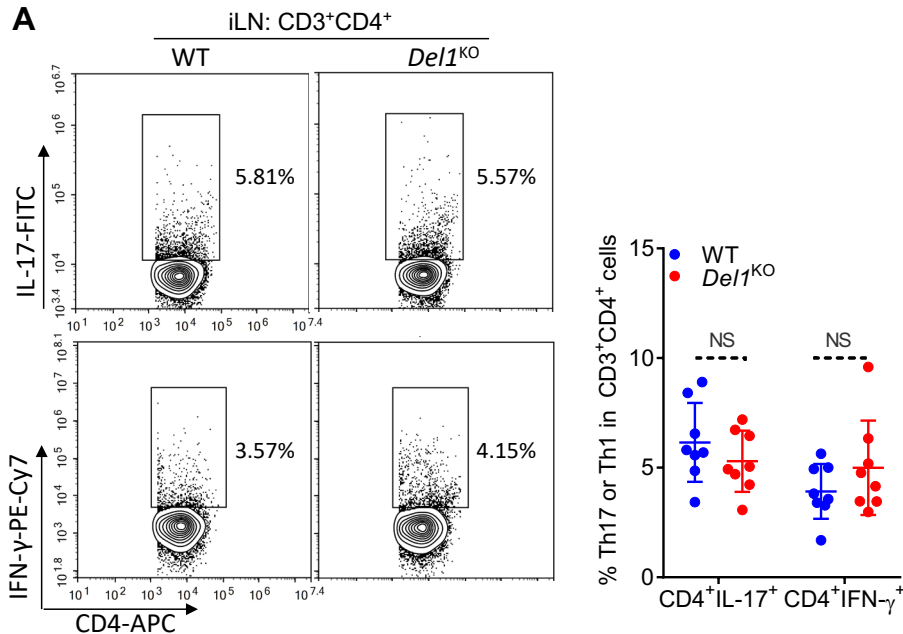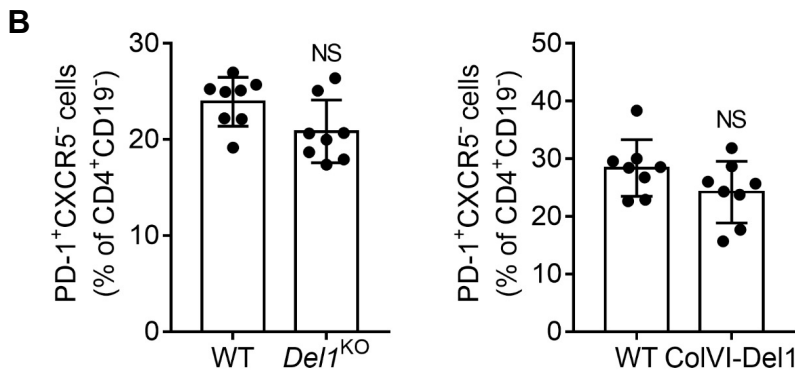

539  
 540 **Supplemental figure 11. (A) *Del1*<sup>KO</sup> and WT littermate control mice exhibit similar frequencies**  
 541 **of Th1 and Th17 cells in inguinal LNs upon CIA.** CIA was induced by i.d. injection of 2 mg/ml CII  
 542 emulsified with 1 mg/ml CFA into the tail at day 0 in groups of *Del1*<sup>KO</sup> mice and WT littermate  
 543 controls. On day 10, mononuclear cells from inguinal LNs were harvested and processed for  
 544 staining for CD3, CD4 as well as IFN- $\gamma$  and IL-17, markers for Th1 and Th17 cells, respectively.  
 545 Representative FACS plots (left) and frequencies of indicated Th cell subsets (right). **(B) The**  
 546 **frequencies of PD-1<sup>+</sup>CXCR5<sup>-</sup> T cells are not altered by DEL-1 overexpression or deletion in the**  
 547 **CIA model.** CIA was induced by i.d. injection of 2 mg/ml CII emulsified with CFA (1 mg/ml, left  
 548 panel; 2 mg/ml, right panel) into the tail at day 0 in groups of *Del1*<sup>KO</sup> or ColVI-Del1 mice and WT  
 549 littermate controls. On day 10, mononuclear cells from inguinal LNs were harvested and analyzed  
 550 by flow cytometry for the indicated cell markers. Data are means  $\pm$  SD ( $n = 8$  mice/group from  
 551 two independent experiments). NS, not significant. Student's unpaired  $t$ -test.

552  
 553



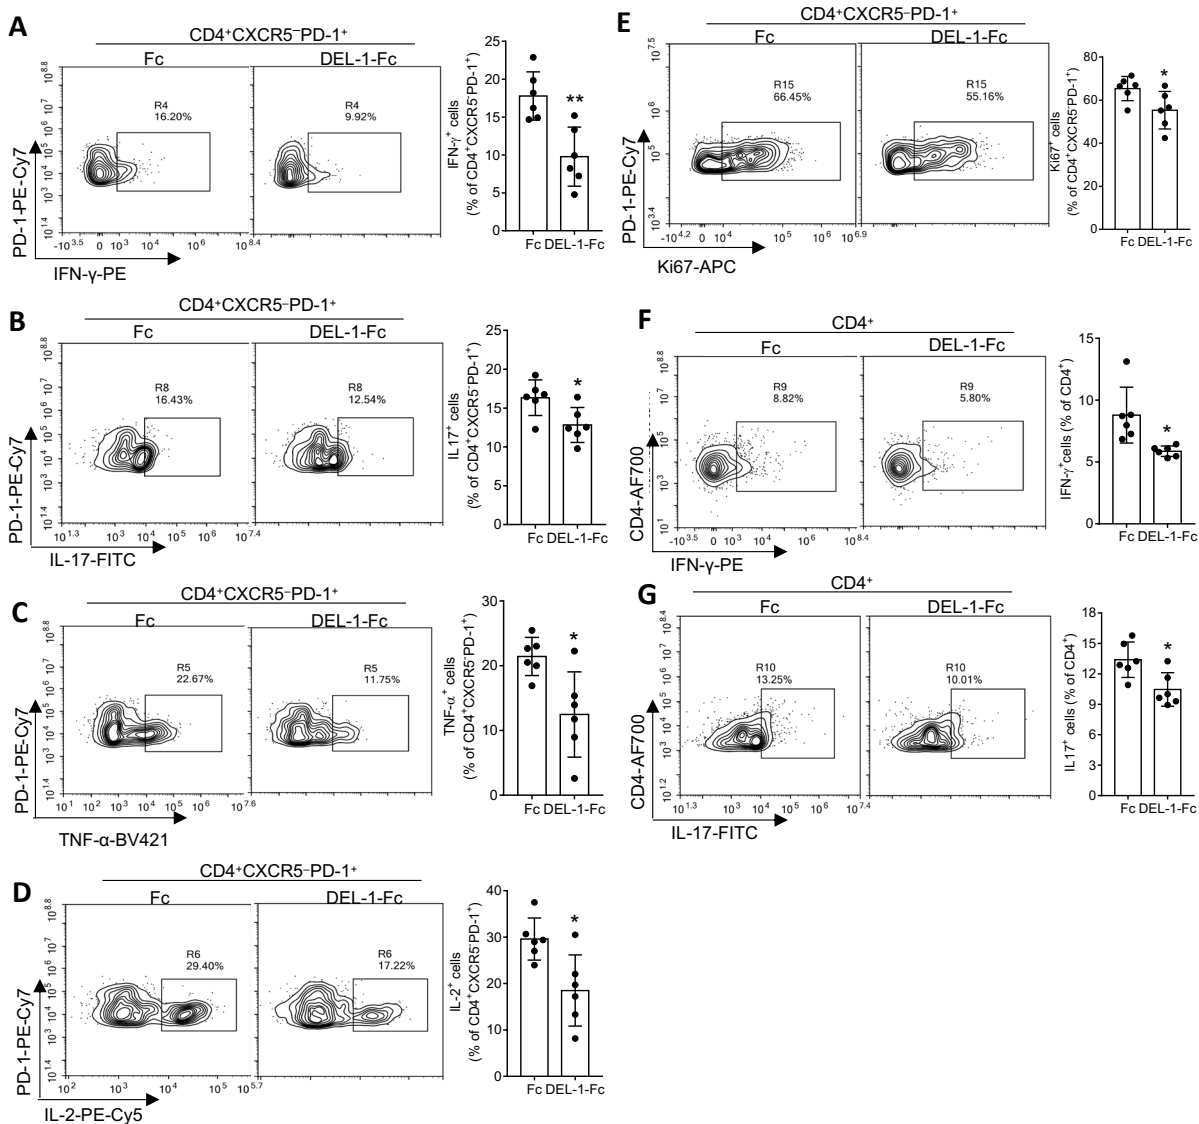

554  
 555  
 556  
 557  
 558  
 559  
 560  
 561  
 562  
 563  
 564  
 565  
 566  
 567  
 568

**Supplemental figure 12. DEL-1 inhibits activation of non-Tfh cells in vitro.** BMDCs were treated with LPS (100 ng/ml) for 6 h, washed and then co-cultured with naïve CD4<sup>+</sup>T cells stimulated with anti-CD3 and anti-CD28, in the presence of 10  $\mu$ g/ml DEL-1-Fc or equal molar concentration of Fc control for 3 days (IL-2, TNF- $\alpha$ , and Ki67 assays) or 7 days (all other assays). Cells were harvested and stained with the indicated markers and analyzed by flow cytometry. (A-E) Representative FACS histograms (left) and frequencies of IFN- $\gamma$ <sup>+</sup>, IL-17<sup>+</sup>, TNF- $\alpha$ <sup>+</sup>, IL-2<sup>+</sup> and Ki67<sup>+</sup> cells in CD4<sup>+</sup>CXCR5<sup>+</sup>PD-1<sup>+</sup> T cells (right). (F,G) Representative FACS histograms (left) and frequencies of Th1 (IFN- $\gamma$ <sup>+</sup>) and Th17 (IL-17<sup>+</sup>) cells in CD4<sup>+</sup> T cells (right). Data are means  $\pm$  SD ( $n$ = 6 co-cultures/group, from two independent experiments). \* $P$  < 0.05; \*\* $P$  < 0.01 vs. Fc control. Student's unpaired  $t$ -test.

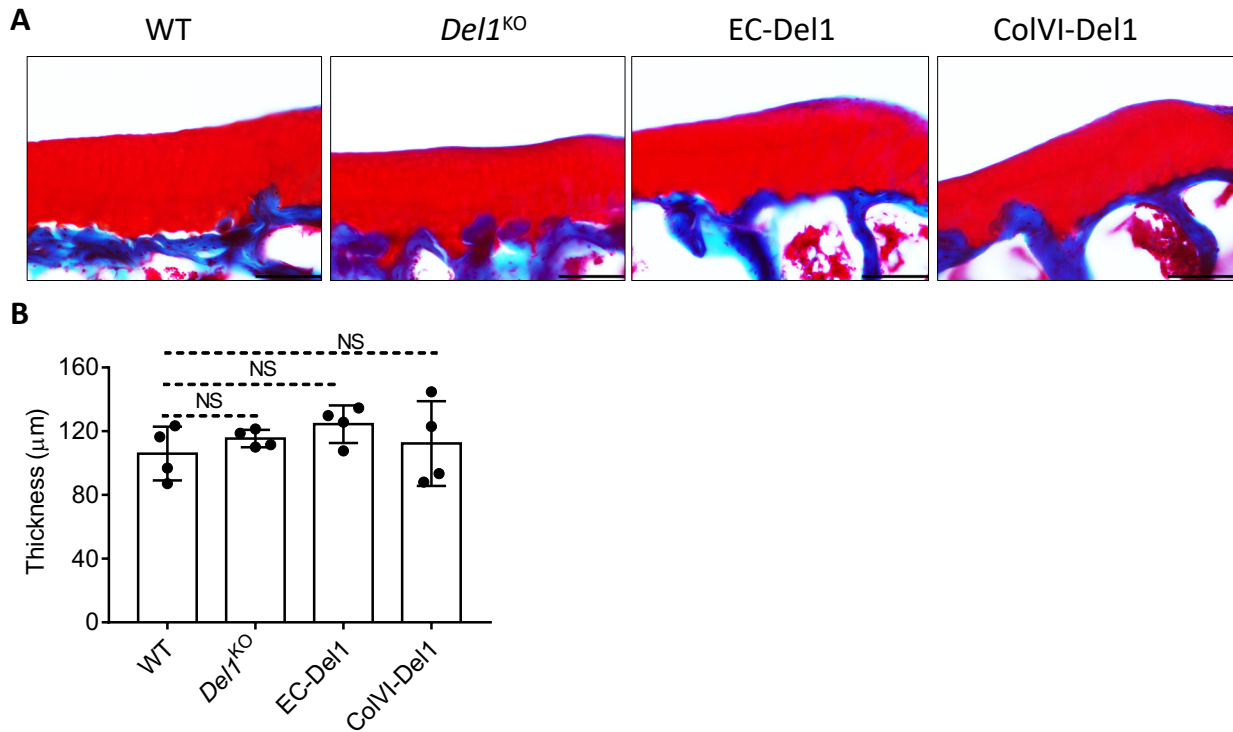

570  
 571 **Supplemental figure 13. WT, *Del1*<sup>KO</sup>, EC-Del1, and ColVI-Del1 mice have similar articular**  
 572 **cartilage thickness at steady state.** Knee joints from 10-week-old WT, *Del1*<sup>KO</sup>, EC-Del1, and ColVI-  
 573 Del1 mice were harvested, sectioned and stained with safranin-O. (A) Representative safranin-  
 574 O-stained sections of tibial articular cartilage. Scale bars, 100 μm. (B) Thickness of tibial articular  
 575 cartilage of the indicated genotypes, measured morphometrically (13). Data are means ± SD (*n*  
 576 = 4 mice/group). NS, not significant. One-way ANOVA and Dunnett's multiple comparisons test.  
 577

578

579

580

581

582

583

584

585

586

587
